# Supplementary material for: Targeted plasma proteomics identifies a novel, robust association between cornulin and Swedish moist snuff
Source: PubMed Central journal article supplement (PMC5797131; doi:10.1038/s41598-018-20794-3), 2018-02-02
Supplement: 41598_2018_20794_MOESM1_ESM.pdf [file 41598_2018_20794_MOESM1_ESM.pdf]

# Supplemental Material

## Targeted plasma proteomics identifies a novel, robust association between cornulin and Swedish moist snuff

Anneli Sundkvist<sup>1</sup>, Robin Myte<sup>1</sup>, Stina Bodén<sup>1</sup>, Stefan Enroth<sup>2</sup>, Ulf Gyllensten<sup>2</sup>, Sophia Harlid<sup>1</sup>,  
Bethany van Guelpen<sup>1</sup>

<sup>1</sup> *Department of Radiation Sciences, Oncology, Umeå University, Umeå, Sweden.*

<sup>2</sup> *Department of Immunology, Genetics, and Pathology, Biomedical Center, Science for Life Laboratory Uppsala University, Uppsala, Sweden*

| <b>Table of Contents:</b> |                                                                                                                     | <b>Page</b> |
|---------------------------|---------------------------------------------------------------------------------------------------------------------|-------------|
| Supplementary Figure S1   | Log2-Normalized Protein eXpression (NPX) levels of lifestyle behavior-associated proteins per individual and sample | 2           |
| Supplementary Table S1    | Proteins included in Proseek Multiplex® immunoassay panels                                                          | 3-7         |

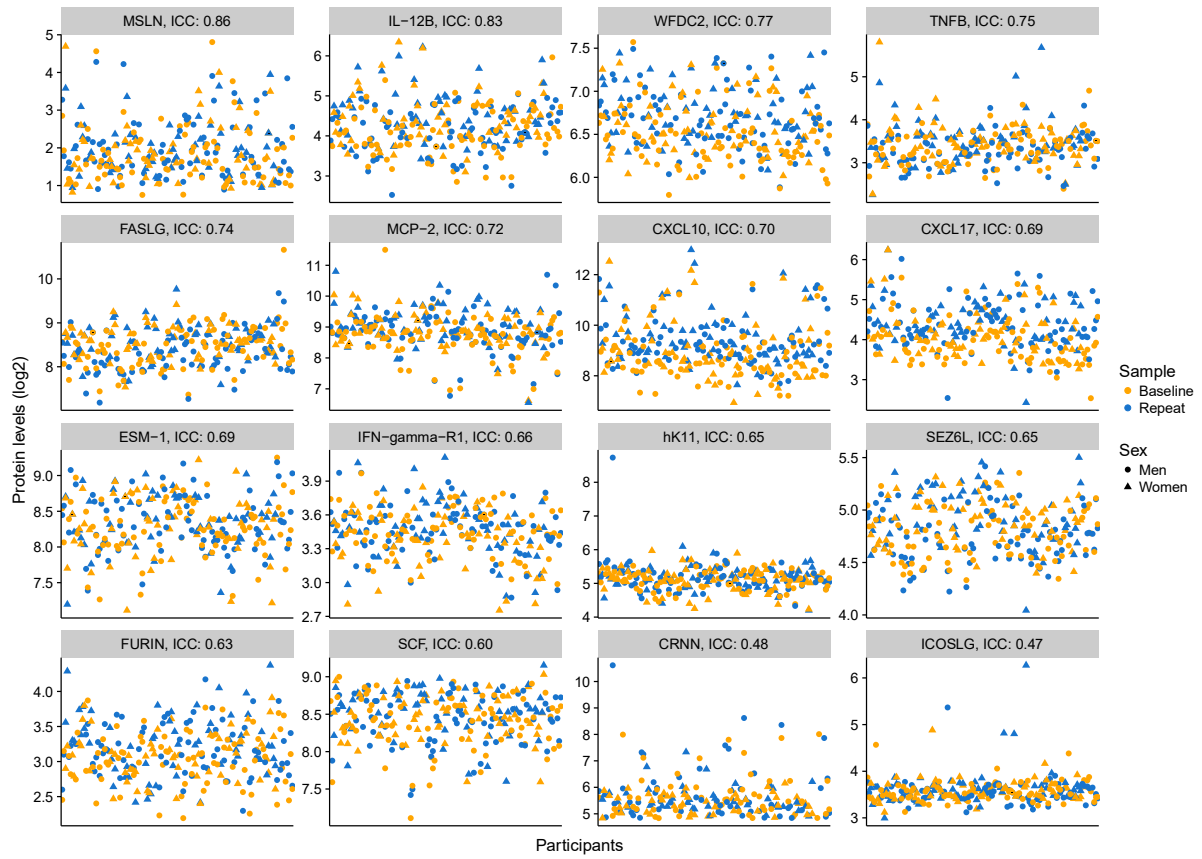

**Supplementary Figure 1. Log2-Normalized Protein eXpression (NPX) levels of lifestyle behavior-associated proteins per individual and sample.** ICC: Intraclass correlation coefficient, i.e., proportion of total variance due to variation between individuals.

---

**Supplementary Table S1. Proteins included in Proseek Multiplex® immunoassay panels**


---

| Protein                                                                | UniProt No | Immunoassay panel | Comment                 |
|------------------------------------------------------------------------|------------|-------------------|-------------------------|
| Hepatocyte growth factor (HGF)                                         | P14210     | Both              |                         |
| Interleukin-6 (IL-6)                                                   | P05231     | Both              |                         |
| Stem cell factor (SCF)                                                 | P21583     | Both              | Excluded from one panel |
| TNF-related apoptosis-inducing ligand (TRAIL, TNFSF10)                 | P50591     | Both              | Excluded from one panel |
| Transforming growth factor alpha (TGF-alpha)                           | P01135     | Both              |                         |
| Vascular endothelial growth factor A (VEGF-A)                          | P15692     | Both              |                         |
| Adenosine Deaminase (ADA)                                              | P00813     | Inflammation      |                         |
| Artemin (ARTN)                                                         | Q5T4W7     | Inflammation      | Excluded (>50% missing) |
| Axin-1 (AXIN1)                                                         | O15169     | Inflammation      |                         |
| Beta-nerve growth factor (Beta-NGF) P01138                             | P01138     | Inflammation      |                         |
| Brain-derived neurotrophic factor (BDNF)                               | P23560     | Inflammation      |                         |
| Caspase 8 (CASP-8 )                                                    | Q14790     | Inflammation      |                         |
| C-C motif chemokine 19 (CCL19)                                         | Q99731     | Inflammation      |                         |
| C-C motif chemokine 20 (CCL20)                                         | P78556     | Inflammation      |                         |
| C-C motif chemokine 23 (CCL23)                                         | P55773     | Inflammation      |                         |
| C-C motif chemokine 25 (CCL25)                                         | O15444     | Inflammation      |                         |
| C-C motif chemokine 28 (CCL28)                                         | Q9NRJ3     | Inflammation      |                         |
| C-C motif chemokine 4 (CCL4 )                                          | P13236     | Inflammation      |                         |
| CD40L receptor (CD40)                                                  | P25942     | Inflammation      |                         |
| CUB domain-containing protein 1 (CDCP1)                                | Q9H5V8     | Inflammation      |                         |
| C-X-C motif chemokine 1 (CXCL1)                                        | P09341     | Inflammation      |                         |
| C-X-C motif chemokine 10 (CXCL10)                                      | P02778     | Inflammation      |                         |
| C-X-C motif chemokine 11 (CXCL11)                                      | O14625     | Inflammation      |                         |
| C-X-C motif chemokine 5 (CXCL5)                                        | P42830     | Inflammation      |                         |
| C-X-C motif chemokine 6 (CXCL6)                                        | P80162     | Inflammation      |                         |
| C-X-C motif chemokine 9 (CXCL9 )                                       | Q07325     | Inflammation      |                         |
| Cystatin D (CST5)                                                      | P28325     | Inflammation      |                         |
| Delta and Notch-like epidermal growth factor-related recep (DNER)      | Q8NFT8     | Inflammation      |                         |
| Eotaxin-1 (CCL11)                                                      | P51671     | Inflammation      |                         |
| Eukaryotic translation initiation factor 4E-binding protein 1 (4E-BP1) | Q13541     | Inflammation      |                         |
| Fibroblast growth factor 19 (FGF-19)                                   | O95750     | Inflammation      |                         |
| Fibroblast growth factor 21 (FGF-21)                                   | Q9NSA1     | Inflammation      |                         |
| Fibroblast growth factor 23 (FGF-23)                                   | Q9GZV9     | Inflammation      |                         |
| Fibroblast growth factor 5 (FGF-5)                                     | Q8NF90     | Inflammation      |                         |
| Fms-related tyrosine kinase 3 ligand (Flt3L)                           | P49771     | Inflammation      |                         |
| Fractalkine (CX3CL1 )                                                  | P78423     | Inflammation      |                         |
| Glial cell line-derived neurotrophic factor (hGDNF)                    | P39905     | Inflammation      |                         |

Table continues on next page

Table S1. Cont.

| Protein                                                                              | UniProt No | Immunoassay panel | Comment                 |
|--------------------------------------------------------------------------------------|------------|-------------------|-------------------------|
| Interferon gamma (IFN-gamma)                                                         | P01579     | Inflammation      | Excluded (>50% missing) |
| Interleukin-1 alpha (IL-1 alpha)                                                     | P01583     | Inflammation      | Excluded (>50% missing) |
| Interleukin-10 (IL-10)                                                               | P22301     | Inflammation      |                         |
| Interleukin-10 receptor subunit alpha (IL-10RA)                                      | Q13651     | Inflammation      | Excluded (>50% missing) |
| Interleukin-10 receptor subunit beta (IL-10RB)                                       | Q08334     | Inflammation      |                         |
| Interleukin-12 subunit beta (IL-12B)                                                 | P29460     | Inflammation      |                         |
| Interleukin-13 (IL-13)                                                               | P35225     | Inflammation      | Excluded (>50% missing) |
| Interleukin-15 receptor subunit alpha (IL-15RA)                                      | Q13261     | Inflammation      |                         |
| Interleukin-17A (IL-17A)                                                             | Q16552     | Inflammation      |                         |
| Interleukin-17C (IL-17C)                                                             | Q9P0M4     | Inflammation      |                         |
| Interleukin-18 (IL-18)                                                               | Q14116     | Inflammation      |                         |
| Interleukin-18 receptor 1 (IL-18R1)                                                  | Q13478     | Inflammation      |                         |
| Interleukin-2 (IL-2)                                                                 | P60568     | Inflammation      | Excluded (>50% missing) |
| Interleukin-2 receptor subunit beta (IL-2RB)                                         | P14784     | Inflammation      | Excluded (>50% missing) |
| Interleukin-20 (IL-20)                                                               | Q9NYY1     | Inflammation      | Excluded (>50% missing) |
| Interleukin-20 receptor subunit alpha (IL-20RA)                                      | Q9UHF4     | Inflammation      | Excluded (>50% missing) |
| Interleukin-22 receptor subunit alpha-1 (IL-22 RA1)                                  | Q8N6P7     | Inflammation      | Excluded (>50% missing) |
| Interleukin-24 (IL-24)                                                               | Q13007     | Inflammation      | Excluded (>50% missing) |
| Interleukin-33 (IL-33)                                                               | O95760     | Inflammation      | Excluded (>50% missing) |
| Interleukin-4 (IL-4)                                                                 | P05112     | Inflammation      | Excluded (>50% missing) |
| Interleukin-5 (IL-5)                                                                 | P05113     | Inflammation      | Excluded (>50% missing) |
| Interleukin-7 (IL-7)                                                                 | P13232     | Inflammation      |                         |
| Interleukin-8 (IL-8)                                                                 | P10145     | Inflammation      |                         |
| Latency-associated peptide transforming growth factor beta 1 (LAP TGF-beta-1, TGFB1) | P01137     | Inflammation      |                         |
| Leukemia inhibitory factor (LIF)                                                     | P15018     | Inflammation      | Excluded (>50% missing) |
| Leukemia inhibitory factor receptor (LIF-R)                                          | P42702     | Inflammation      |                         |
| Macrophage colony-stimulating factor 1 (CSF-1)                                       | P09603     | Inflammation      |                         |
| Macrophage inflammatory protein 1-alpha (MIP-1 alpha, CCL3)                          | P10147     | Inflammation      |                         |
| Matrix metalloproteinase-1 (MMP-1)                                                   | P03956     | Inflammation      |                         |
| Matrix metalloproteinase-10 (MMP-10)                                                 | P09238     | Inflammation      |                         |
| Monocyte chemoattractant protein 1 (MCP-1)                                           | P13500     | Inflammation      |                         |
| Monocyte chemoattractant protein 2 (MCP-2, 8CCL89)                                   | P80075     | Inflammation      |                         |
| Monocyte chemoattractant protein 3 (MCP-3)                                           | P80098     | Inflammation      |                         |
| Monocyte chemoattractant protein 4 (MCP-4)                                           | Q99616     | Inflammation      |                         |
| Natural killer cell receptor 2B4 (BDNF4)                                             | Q9BZW8     | Inflammation      |                         |
| Neurotrophin-3 (NT-3)                                                                | P20783     | Inflammation      |                         |
| Neurturin (NRTN)                                                                     | Q99748     | Inflammation      | Excluded (>50% missing) |

Table continues on next page

Table S1. Cont.

| Protein                                                                        | UniProt No       | Immunoassay panel | Comment                 |
|--------------------------------------------------------------------------------|------------------|-------------------|-------------------------|
| Oncostatin-M (OSM)                                                             | P13725           | Inflammation      |                         |
| Osteoprotegerin (OPG)                                                          | O00300           | Inflammation      |                         |
| Programmed cell death 1 ligand 1 (PD-L1)                                       | Q9NZQ7           | Inflammation      |                         |
| Protein S100-A12 (EN-RAGE )                                                    | P80511           | Inflammation      |                         |
| Signaling lymphocytic activation molecule (SLAMF1)                             | Q13291           | Inflammation      |                         |
| SIR2-like protein 2 (SIRT2)                                                    | Q8IXJ6           | Inflammation      |                         |
| STAM-binding protein (STAMPB)                                                  | O95630           | Inflammation      |                         |
| Sulfotransferase 1A1 (ST1A1)                                                   | P50225           | Inflammation      |                         |
| T cell surface glycoprotein CD6 isoform (CD6)                                  | Q8WWJ7           | Inflammation      |                         |
| T-cell surface glycoprotein CD5 (CD5)                                          | P06127           | Inflammation      |                         |
| Thymic stromal lymphopoietin (TSLP)                                            | Q969D9           | Inflammation      | Excluded (>50% missing) |
| TNF-beta (TNFB)                                                                | P01374           | Inflammation      |                         |
| TNF-related activation-induced cytokine (TRANCE)                               | O14788           | Inflammation      |                         |
| Tumor necrosis factor (Ligand) superfamily, member 12 (TWEAK)                  | Q4ACW9           | Inflammation      |                         |
| Tumor necrosis factor (TNF)                                                    | P01375           | Inflammation      | Excluded (>50% missing) |
| Tumor necrosis factor ligand superfamily member 14 (TNFSF14)                   | O43557           | Inflammation      |                         |
| Tumor necrosis factor receptor superfamily member 9 (TNFRSF9)                  | Q07011           | Inflammation      |                         |
| Urokinase-type plasminogen activator (uPA)                                     | P00749           | Inflammation      |                         |
| 5'-nucleotidase (5'-NT)                                                        | P21589           | Oncology II       |                         |
| A disintegrin and metalloproteinase with thrombospondin motifs 15 (ADAM-TS 15) | Q8TE58           | Oncology II       |                         |
| A/B (MIC-A/B)                                                                  | Q29980<br>Q29983 | Oncology II       |                         |
| AlPha-taxilin (TXLNA)                                                          | P40222           | Oncology II       |                         |
| AmPhiregulin (AR)                                                              | P15514           | Oncology II       |                         |
| Annexin A1 (ANXA1)                                                             | P04083           | Oncology II       |                         |
| Carbonic anhydrase 9 (CA9)                                                     | Q16790           | Oncology II       |                         |
| Carboxypeptidase E (CPE)                                                       | P16870           | Oncology II       |                         |
| Carcinoembryonic antigen-related celladhesion molecule 1 (CEACAM1)             | P13688           | Oncology II       |                         |
| Carcinoembryonic antigen-related celladhesion molecule 5 (CEA, CEACAM5)        | P06731           | Oncology II       |                         |
| Cathepsin L2 (CTSV)                                                            | O60911           | Oncology II       |                         |
| CD160 antigen (CD160)                                                          | O95971           | Oncology II       |                         |
| CD27 antigen (CD27)                                                            | P26842           | Oncology II       |                         |
| CD48 antigen (CD48)                                                            | P09326           | Oncology II       |                         |
| CD70 antigen (CD70)                                                            | P32970           | Oncology II       |                         |
| Cornulin (CRNN)                                                                | Q9UBG3           | Oncology II       |                         |
| C-type lectin domain family 4 member K(CD207)                                  | Q9UJ71           | Oncology II       |                         |
| C-X-C motif chemokine 13 (CXCL13)                                              | O43927           | Oncology II       |                         |
| Cyclin-dependent kinase inhibitor 1 (CDKN1A)                                   | P38936           | Oncology II       |                         |

Table continues on next page

Table S1. Cont.

| Protein                                                             | UniProt No | Immunoassay panel | Comment |
|---------------------------------------------------------------------|------------|-------------------|---------|
| Delta-like protein 1 (DLL1)                                         | O00548     | Oncology II       |         |
| Disintegrin and metalloproteinase domain-containing protein (ADAM8) | P78325     | Oncology II       |         |
| Endothelial cell-specific molecule 1 (ESM-1)                        | Q9NQ30     | Oncology II       |         |
| Ephrin type-A receptor 2 (EPHA2)                                    | P29317     | Oncology II       |         |
| FAS-associated death domain protein (FADD)                          | Q13158     | Oncology II       |         |
| Fc receptor-like B (FCRLB)                                          | Q6BAA4     | Oncology II       |         |
| Fibroblast growth factor-binding Protein 1(FGF-BP1)                 | Q14512     | Oncology II       |         |
| Folate receptor alpha (FR-alpha)                                    | P15328     | Oncology II       |         |
| Folate receptor gamma (FR-gamma)                                    | P41439     | Oncology II       |         |
| Furin (FURIN)                                                       | P09958     | Oncology II       |         |
| Galectin-1 (Gal-1)                                                  | P09382     | Oncology II       |         |
| Glypican-1 (GPC1)                                                   | P35052     | Oncology II       |         |
| Granzyme B (GZMB)                                                   | P10144     | Oncology II       |         |
| Granzyme H (GZMH)                                                   | P20718     | Oncology II       |         |
| ICOS ligand (ICOSLG)                                                | O75144     | Oncology II       |         |
| Insulin-like growth factor 1 receptor (IGF1R)                       | P08069     | Oncology II       |         |
| Integrin alpha-V (ITGAV)                                            | P06756     | Oncology II       |         |
| Integrin beta-5 (ITGB5)                                             | P18084     | Oncology II       |         |
| Interferon gamma receptor 1 (IFN-gamma-R1)                          | P15260     | Oncology II       |         |
| Kallikrein-11 (hK11)                                                | Q9UBX7     | Oncology II       |         |
| Kallikrein-13 (KLK13)                                               | Q9UKR3     | Oncology II       |         |
| Kallikrein-14 (hK14)                                                | Q9P0G3     | Oncology II       |         |
| Kallikrein-8 (hK8)                                                  | O60259     | Oncology II       |         |
| Ly6/PLAUR domain-containing Protein 3 (LYPD3)                       | O95274     | Oncology II       |         |
| Melanoma-derived growth regulatory Protein (MIA)                    | Q16674     | Oncology II       |         |
| Mesothelin (MSLN)                                                   | Q13421     | Oncology II       |         |
| Methionine aminoPeptidase 2 (MetAp2)                                | P50579     | Oncology II       |         |
| Midkine (Mk)                                                        | P21741     | Oncology II       |         |
| Mothers against decapentaplegic homolog 5 (MAD homolog 5)           | Q99717     | Oncology II       |         |
| Mucin-16 (MUC-16)                                                   | Q8WXI7     | Oncology II       |         |
| Nectin-4 (PVRL4)                                                    | Q96NY8     | Oncology II       |         |
| Pancreatic prohormone (PPY)                                         | P01298     | Oncology II       |         |
| Podocalyxin (PODXL)                                                 | O00592     | Oncology II       |         |
| Pro-epidermal growth factor (EGF)                                   | P01133     | Oncology II       |         |
| Protein CYR61 (CYR61)                                               | O00622     | Oncology II       |         |
| Protein S100-A11 (S100A11)                                          | P31949     | Oncology II       |         |
| Protein S100-A4 (S100A4)                                            | P26447     | Oncology II       |         |

Table continues on next page

Table S1. Cont.

| Protein                                                            | UniProt No | Immunoassay panel | Comment |
|--------------------------------------------------------------------|------------|-------------------|---------|
| Proto-oncogene tyrosine-protein kinase receptor Ret (RET)          | P07949     | Oncology II       |         |
| Receptor tyrosineprotein kinase erbB-2(ERBB2)                      | P04626     | Oncology II       |         |
| Receptor tyrosineprotein kinase erbB-3 (ERBB3)                     | P21860     | Oncology II       |         |
| Receptor tyrosineprotein kinase erbB-4 (ERBB4)                     | Q15303     | Oncology II       |         |
| R-spondin-3 (RSPO3)                                                | Q9BXY4     | Oncology II       |         |
| Secretory carrier-associated membraneprotein 3 (SCAMP3)            | O14828     | Oncology II       |         |
| Seizure 6-like protein (SEZ6L)                                     | Q9BYH1     | Oncology II       |         |
| SPARC (SPARC)                                                      | P09486     | Oncology II       |         |
| Syndecan-1 (SYND1)                                                 | P18827     | Oncology II       |         |
| T-cell leukemia / lymphoma Protein 1A (TCL1A)                      | P56279     | Oncology II       |         |
| TGF-beta receptor type-2 (TGFR-2)                                  | P37173     | Oncology II       |         |
| Tissue factor pathway inhibitor 2 (TFP1-2)                         | P48307     | Oncology II       |         |
| T-lymphocyte surface antigen Ly-9 (LY9)                            | Q9HBM7     | Oncology II       |         |
| Toll-like receptor 3 (TLR3)                                        | O15455     | Oncology II       |         |
| Transmembrane glycoprotein NMB (GPNMB)                             | Q14956     | Oncology II       |         |
| Tumor necrosis factor ligand superfamilymember 13 (TNFSF13, APRIL) | O75888     | Oncology II       |         |
| Tumor necrosis factor ligand superfamilymember 6 (FASLG)           | P48023     | Oncology II       |         |
| Tumor necrosis factor receptor superfamilymember 19 (TNFRSF19)     | Q9NS68     | Oncology II       |         |
| Tumor necrosis factor receptor superfamilymember 4 (TNFRSF4)       | P43489     | Oncology II       |         |
| Tumor necrosis factor receptor superfamilymember 6B (TNFRSF6B)     | O95407     | Oncology II       |         |
| Tyrosineprotein kinase ABL1 (ABL1)                                 | P00519     | Oncology II       |         |
| Tyrosineprotein kinase Lyn (LYN)                                   | P07948     | Oncology II       |         |
| Vascular endothelial growth factor receptor 2 (VEGFR-2)            | P35968     | Oncology II       |         |
| Vascular endothelial growth factor receptor 3 (VEGFR-3)            | P35916     | Oncology II       |         |
| VEGF-co regulated chemokine 1 (CXCL17)                             | Q6UXB2     | Oncology II       |         |
| Vimentin (VIM)                                                     | P08670     | Oncology II       |         |
| WAP four-disulfide core domain protein 2 (WFDC2, HE4)              | Q14508     | Oncology II       |         |
| Wnt inhibitory factor 1 (WIF-1)                                    | Q9Y5W5     | Oncology II       |         |
| WNT1-inducible-signaling pathway protein 1 (WISP-1)                | O95388     | Oncology II       |         |
| Xaa-pro aminopeptidase 2 (XPNPEP2)                                 | O43895     | Oncology II       |         |
